# Supplementary material for: Estrogen Receptor Alpha Signaling Is Responsible for the Female Sex Bias in the Loss of Tolerance and Immune Cell Activation Induced by the Lupus Susceptibility Locus Sle1b
Source: PubMed Central journal article supplement (PMC7683613; doi:10.3389/fimmu.2020.582214), 2020-11-10
Supplement: DataSheet_2.pdf [file DataSheet_2.pdf]

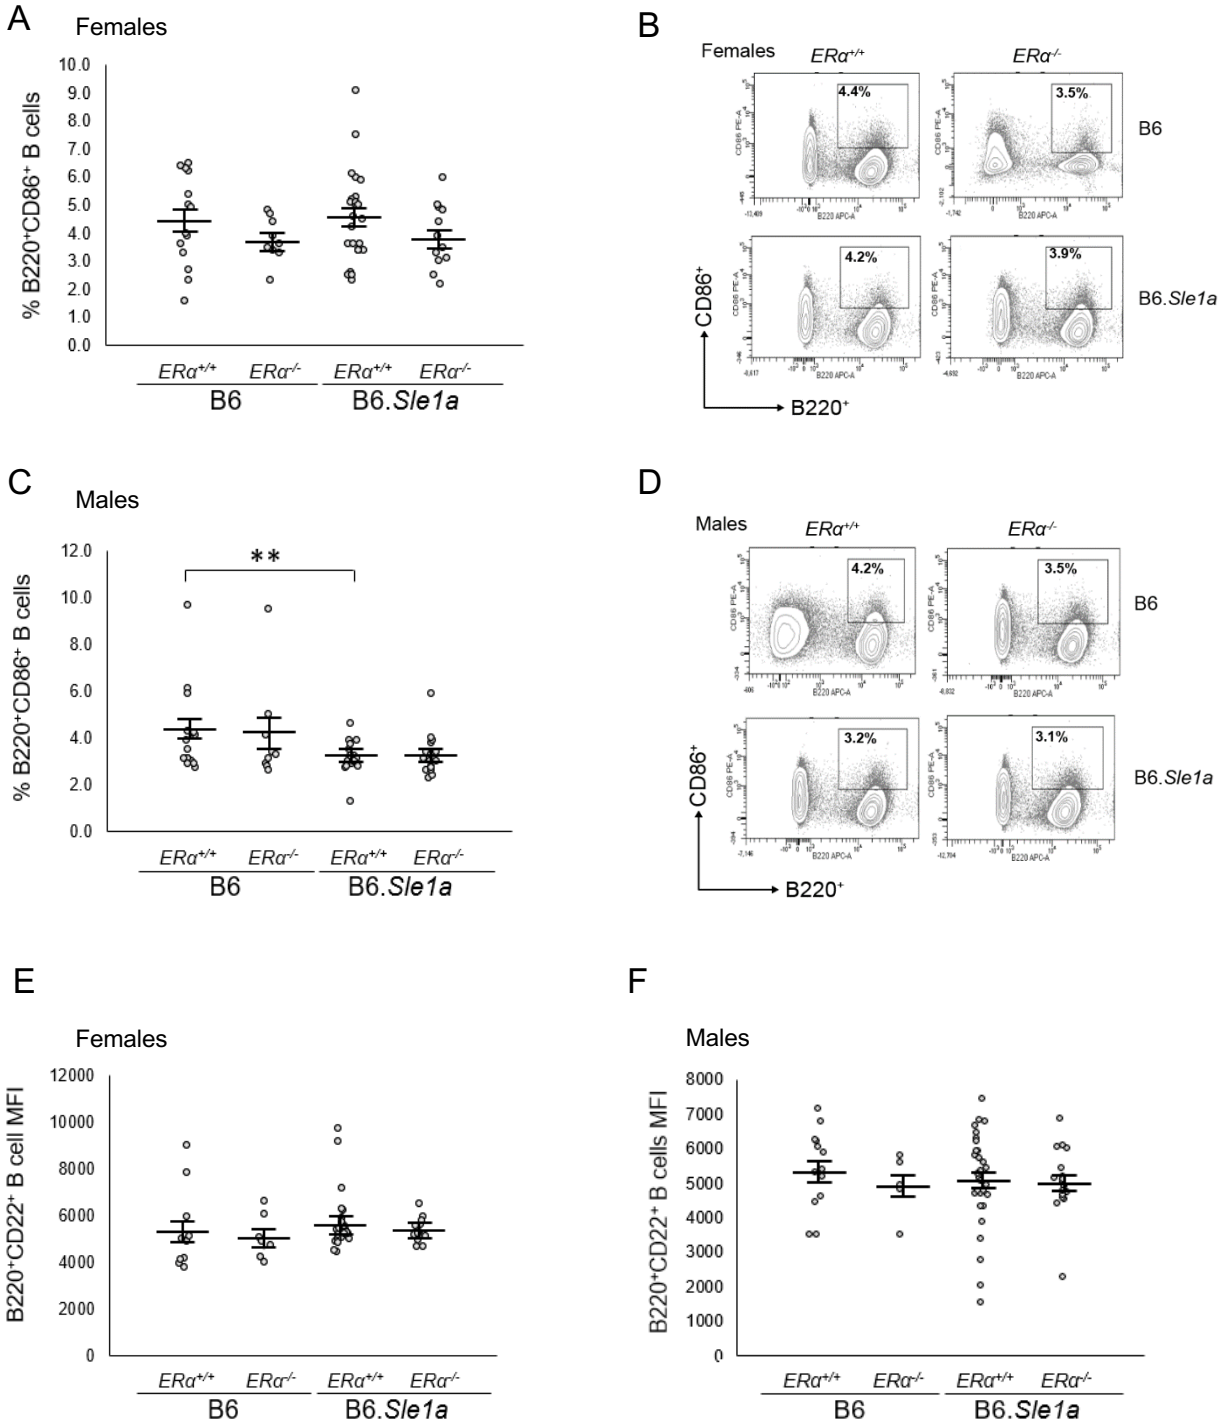

**Supplementary Figure 2: *Sle1a* does not impact B cell activation and ER $\alpha$  does not modulate B cell activation in B6.*Sle1a* mice.** (A) Dot plots show the percentage of splenocytes in female B6.*ER* $\alpha$ <sup>+/+</sup> (N=14), B6.*ER* $\alpha$ <sup>-/-</sup> (N=9), B6.*Sle1a*.*ER* $\alpha$ <sup>+/+</sup> (N=24), and B6.*Sle1a*.*ER* $\alpha$ <sup>-/-</sup>

(N=12) mice that were B220<sup>+</sup>CD86<sup>+</sup> activated B cells. (B) Representative contour plots from female B6.ERα<sup>+/+</sup>, B6.ERα<sup>-/-</sup>, B6.Sle1a.ERα<sup>+/+</sup>, and B6.Sle1a.ERα<sup>-/-</sup> mice show the frequency of B220<sup>+</sup>CD86<sup>+</sup> B cells. (C) Dot plots show the percentage of splenocytes in male mice B6.ERα<sup>+/+</sup> (N=15), B6.ERα<sup>-/-</sup> (N=9), B6.Sle1a.ERα<sup>+/+</sup> (N=16), and B6.Sle1a.ERα<sup>-/-</sup> (N=18) mice that were B220<sup>+</sup>CD86<sup>+</sup> activated B cells. (D) Representative contour plots from male B6.ERα<sup>+/+</sup>, B6.ERα<sup>-/-</sup>, B6.Sle1a.ERα<sup>+/+</sup>, and B6.Sle1a.ERα<sup>-/-</sup> mice show the frequency of B220<sup>+</sup>CD86<sup>+</sup> B cells. (E) Dot plots show CD22 surface expression measured as mean fluorescence intensity (MFI) in B220<sup>+</sup>CD22<sup>+</sup> B cells in female B6.ERα<sup>+/+</sup> (N=10), B6.ERα<sup>-/-</sup> (N=7), B6.Sle1a.ERα<sup>+/+</sup> (N=24), and B6.Sle1a.ERα<sup>-/-</sup> (N=13) mice. (F) Dot plots show CD22 surface expression measured as mean fluorescence intensity (MFI) in B220<sup>+</sup>CD22<sup>+</sup> B cells in male B6.ERα<sup>+/+</sup> (N=13), B6.ERα<sup>-/-</sup> (N=5), B6.Sle1a.ERα<sup>+/+</sup> (N=30), and B6.Sle1a.ERα<sup>-/-</sup> (N=18) mice is shown. Splenocytes were collected from mice that were 5-6 months of age. The longer horizontal bar in each panel denotes the mean for each group, and the shorter black bars indicate the standard error of the mean. The \* indicates p≤0.05, and the \*\* indicates p≤0.01.
