# Supplementary material for: Estrogen Receptor Alpha Signaling Is Responsible for the Female Sex Bias in the Loss of Tolerance and Immune Cell Activation Induced by the Lupus Susceptibility Locus Sle1b
Source: PubMed Central journal article supplement (PMC7683613; doi:10.3389/fimmu.2020.582214), 2020-11-10
Supplement: DataSheet_3.pdf [file DataSheet_3.pdf]

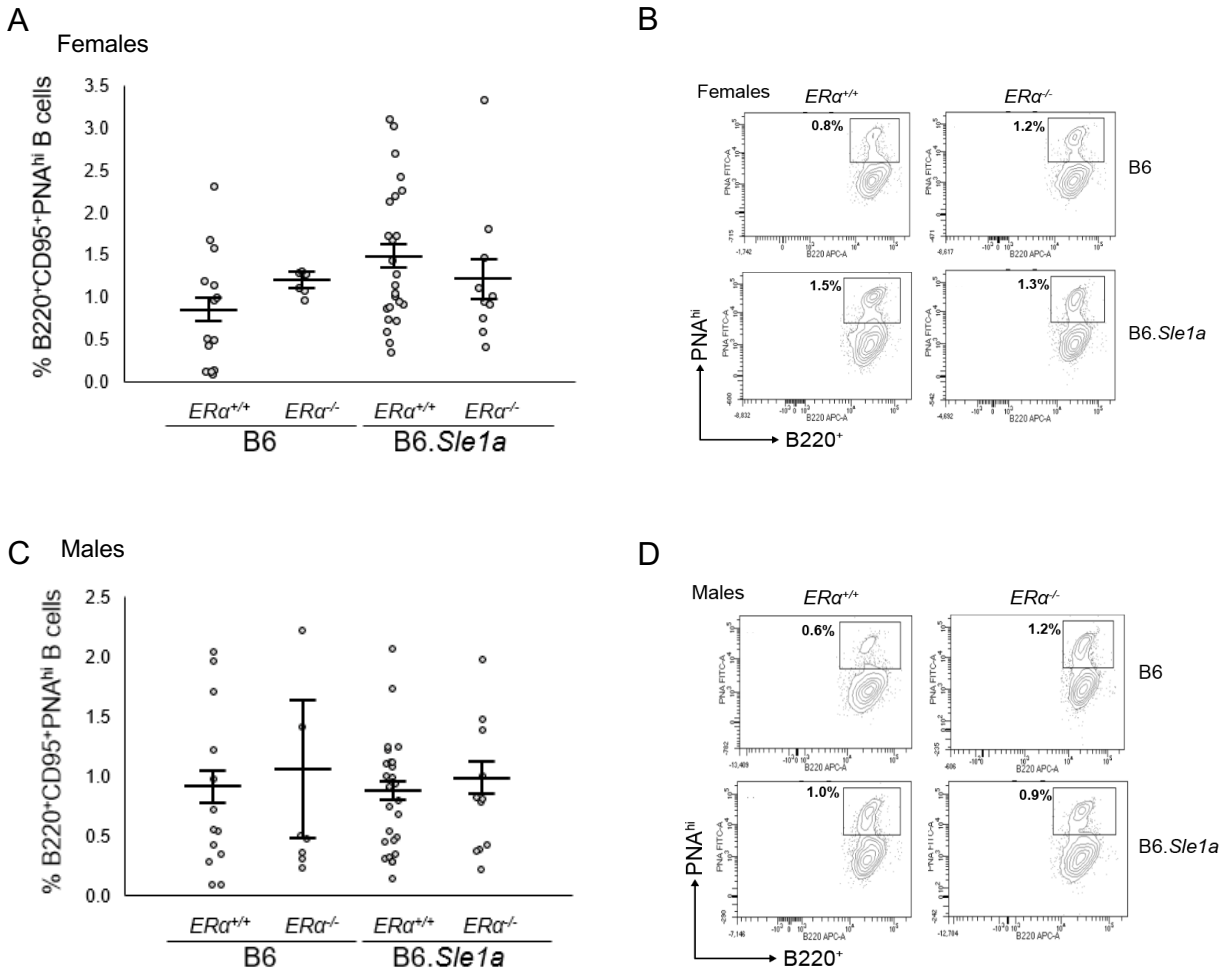

**Supplementary Figure 3: *Sle1a* has no significant impact on the size of the germinal center B cell population.** (A) Dot plots show the percentage of splenocytes in female B6.*ERα*<sup>+/+</sup> (N=14), B6.*ERα*<sup>-/-</sup> (N=7), B6.*Sle1a*.*ERα*<sup>+/+</sup> (N=24), and B6.*Sle1a*.*ERα*<sup>-/-</sup> (N=10) mice that were B220<sup>+</sup>CD95<sup>+</sup>PNA<sup>hi</sup> germinal center B cells. (B) Representative contour plots from female B6.*ERα*<sup>+/+</sup>, B6.*ERα*<sup>-/-</sup>, B6.*Sle1a*.*ERα*<sup>+/+</sup>, and B6.*Sle1a*.*ERα*<sup>-/-</sup> mice show the frequency of B220<sup>+</sup>CD95<sup>+</sup>PNA<sup>hi</sup> germinal center B cells. (C) Dot plots show the percentage of splenocytes in male B6.*ERα*<sup>+/+</sup> (N=13), B6.*ERα*<sup>-/-</sup> (N=7), B6.*Sle1a*.*ERα*<sup>+/+</sup> (N=30), and B6.*Sle1a*.*ERα*<sup>-/-</sup> (N=11) mice that were B220<sup>+</sup>CD95<sup>+</sup>PNA<sup>hi</sup> germinal center B cells. (D) Representative contour plots from male B6.*ERα*<sup>+/+</sup>, B6.*ERα*<sup>-/-</sup>, B6.*Sle1a*.*ERα*<sup>+/+</sup>, and B6.*Sle1a*.*ERα*<sup>-/-</sup> mice show the frequency of B220<sup>+</sup>CD95<sup>+</sup>PNA<sup>hi</sup> germinal center B cells. Splenocytes were collected from mice that were 5-6 months of age. The longer horizontal bar in each panel denotes the mean for each group, and the shorter black bars indicate the standard error of the mean. The \* indicates p≤0.05, and the \*\* indicates p≤0.01.
