# Supplementary material for: Estrogen Receptor Alpha Signaling Is Responsible for the Female Sex Bias in the Loss of Tolerance and Immune Cell Activation Induced by the Lupus Susceptibility Locus Sle1b
Source: PubMed Central journal article supplement (PMC7683613; doi:10.3389/fimmu.2020.582214), 2020-11-10
Supplement: DataSheet_5.pdf [file DataSheet_5.pdf]

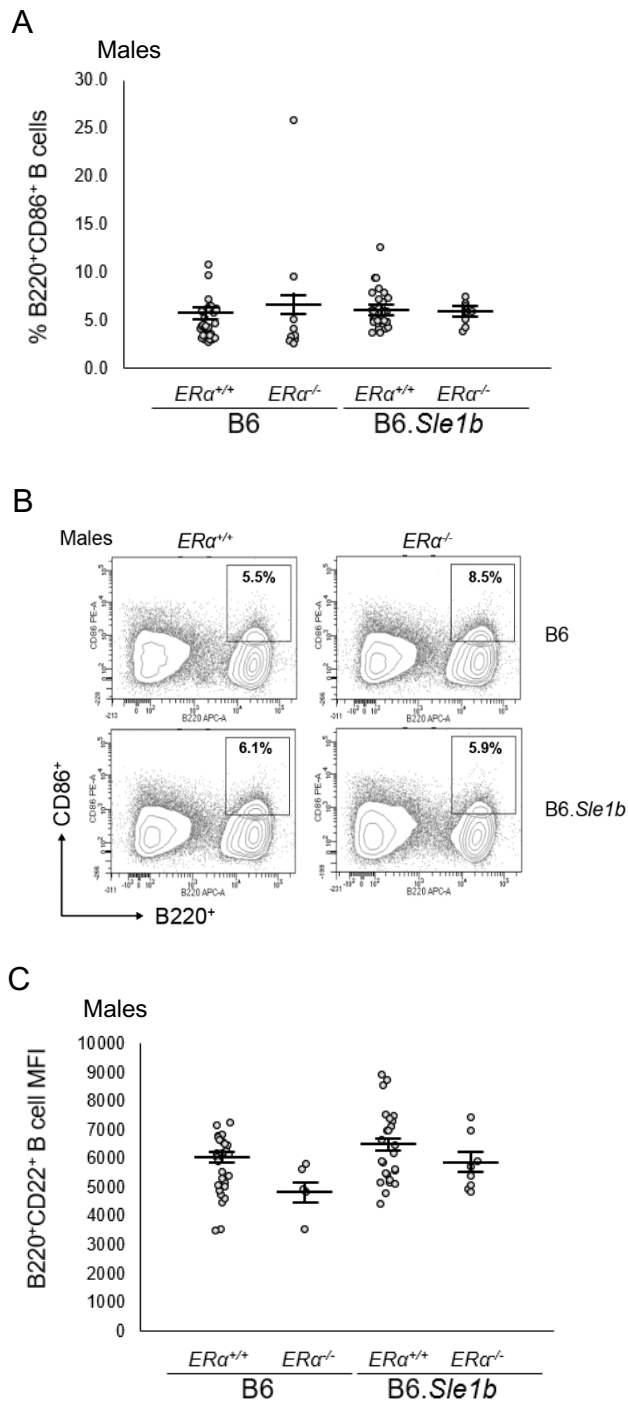

**Supplementary Figure 5: Neither *Sle1b* nor *ERα* impacts B cell activation in males**

(A) Dot plots show the percentage of splenocytes in male B6.*ERα*<sup>+/+</sup> (N=32), B6.*ERα*<sup>-/-</sup> (N=10), B6.*Sle1b.ERα*<sup>+/+</sup> (N=32), and B6.*Sle1b.ERα*<sup>-/-</sup> (N=11) mice that were B220<sup>+</sup>CD86<sup>+</sup> activated B cells. (B) Representative contour plots from show the frequency of B220<sup>+</sup>CD86<sup>+</sup> B cells in male B6.*ERα*<sup>+/+</sup>, B6.*ERα*<sup>-/-</sup>, B6.*Sle1b.ERα*<sup>+/+</sup>, and B6.*Sle1b.ERα*<sup>-/-</sup> mice. (C) Dot plots show CD22

surface expression measured as mean fluorescence intensity (MFI) in B220<sup>+</sup>CD22<sup>+</sup> B cells in male B6.*ERα*<sup>+/+</sup> (N=27), B6.*ERα*<sup>-/-</sup> (N=5) B6.*Sle1b.ERα*<sup>+/+</sup> (N=25), and B6.*Sle1b.ERα*<sup>-/-</sup> (N=8) mice is shown. Splenocytes were collected from mice that were 5-6 months of age. The longer horizontal bar in each panel denotes the mean for each group, and the shorter black bars indicate the standard error of the mean. The \* indicates  $p \leq 0.05$ , and the \*\* indicates  $p \leq 0.01$ .
