# Supplementary material for: Estrogen Receptor Alpha Signaling Is Responsible for the Female Sex Bias in the Loss of Tolerance and Immune Cell Activation Induced by the Lupus Susceptibility Locus Sle1b
Source: PubMed Central journal article supplement (PMC7683613; doi:10.3389/fimmu.2020.582214), 2020-11-10
Supplement: DataSheet_6.pdf [file DataSheet_6.pdf]

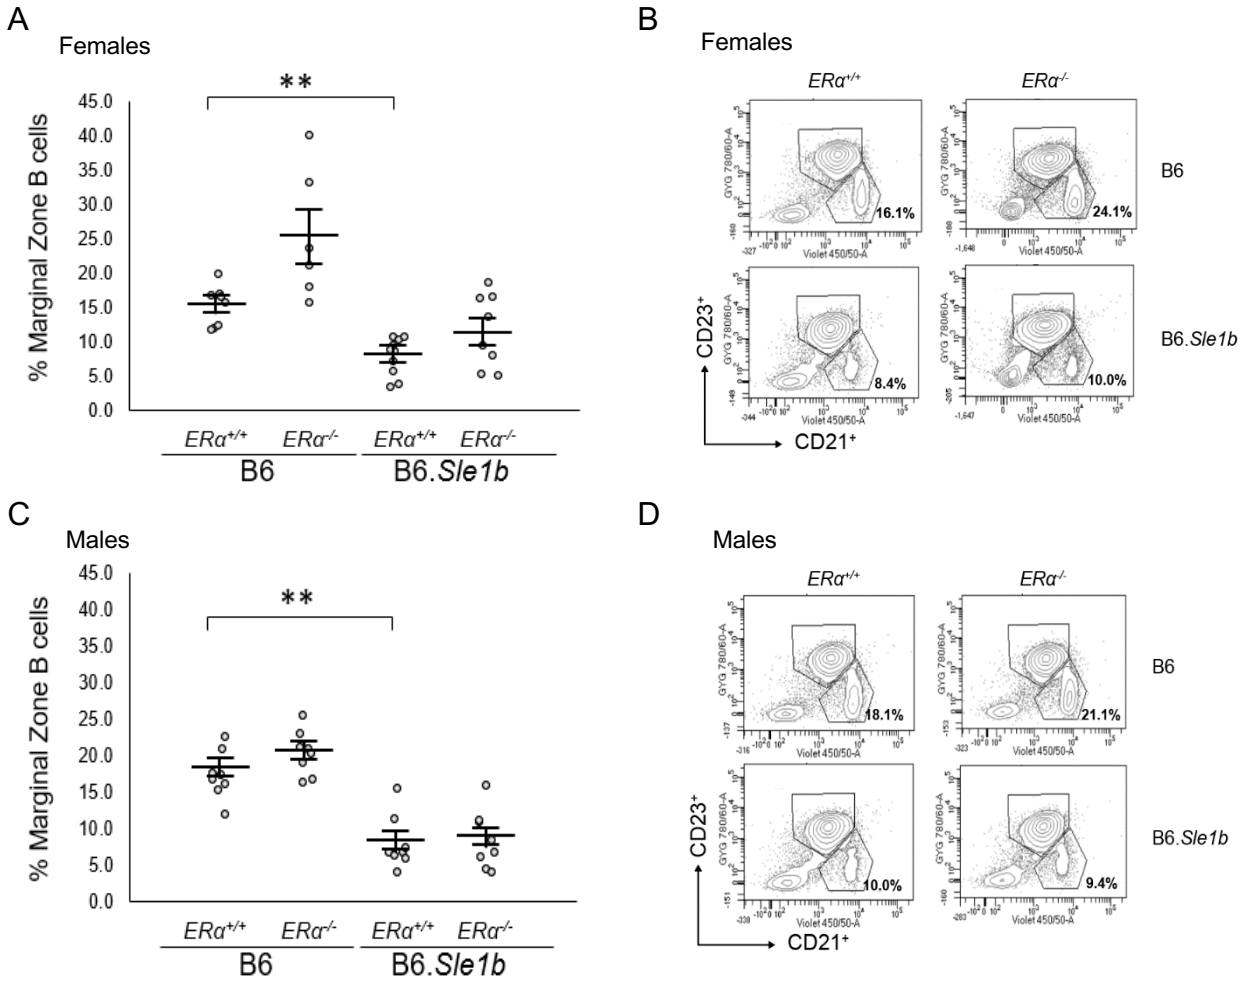

**Supplementary Figure 6: ER $\alpha$  deficiency has no significant impact on marginal zone B cell development in B6.Sle1b congenic mice.** (A) Dot plots show the percentage of splenic marginal zone B cells (identified as lymphocyte singlets that were CD5<sup>-</sup>CD19<sup>+</sup>CD93<sup>-</sup>CD21<sup>+</sup>CD23<sup>-</sup>) in female B6.ER $\alpha$ <sup>+/+</sup>, B6.ER $\alpha$ <sup>-/-</sup>, B6.Sle1b.ER $\alpha$ <sup>+/+</sup>, and B6.Sle1b.ER $\alpha$ <sup>-/-</sup> mice. (B) Representative contour plots from show the frequency of marginal zone B cells in female B6.ER $\alpha$ <sup>+/+</sup>, B6.ER $\alpha$ <sup>-/-</sup>, B6.Sle1b.ER $\alpha$ <sup>+/+</sup>, and B6.Sle1b.ER $\alpha$ <sup>-/-</sup> mice. (C) Dot plots show the percentage of splenic marginal zone B cells in male B6.ER $\alpha$ <sup>+/+</sup>, B6.ER $\alpha$ <sup>-/-</sup>, B6.Sle1b.ER $\alpha$ <sup>+/+</sup>, and B6.Sle1b.ER $\alpha$ <sup>-/-</sup> mice. (D) Representative contour plots from show the frequency of marginal zone B cells in male B6.ER $\alpha$ <sup>+/+</sup>, B6.ER $\alpha$ <sup>-/-</sup>, B6.Sle1b.ER $\alpha$ <sup>+/+</sup>, and B6.Sle1b.ER $\alpha$ <sup>-/-</sup> mice. Splenocytes were collected from mice that were 5-6 months of age. The longer horizontal bar in each panel denotes the mean for each group (N=8 per group), and the shorter black bars indicate the standard error of the mean. The \*\* indicates p $\leq$ 0.01.
