# Supplementary material for: Estrogen Receptor Alpha Signaling Is Responsible for the Female Sex Bias in the Loss of Tolerance and Immune Cell Activation Induced by the Lupus Susceptibility Locus Sle1b
Source: PubMed Central journal article supplement (PMC7683613; doi:10.3389/fimmu.2020.582214), 2020-11-10
Supplement: DataSheet_7.pdf [file DataSheet_7.pdf]

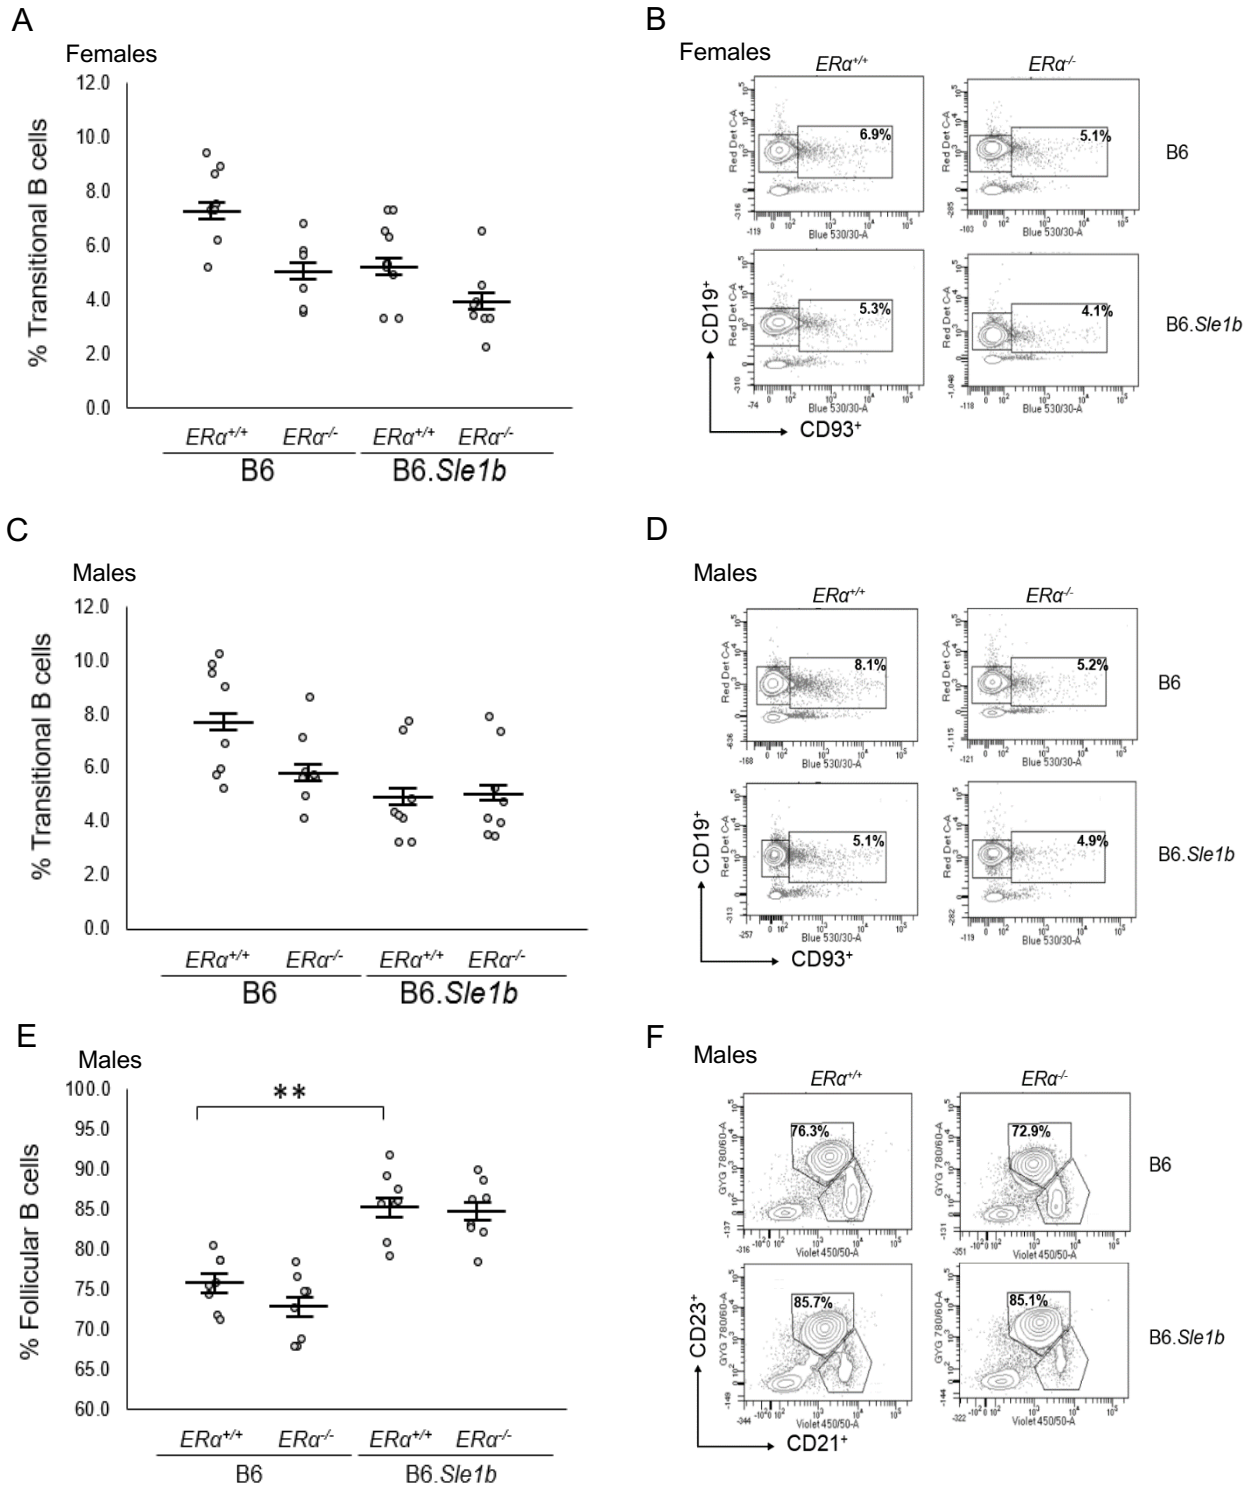

**Supplementary Figure 7: ER $\alpha$  deficiency has no significant impact on transitional B cell development in B6.*Sle1b* congenic mice or follicular B cell development in B6.*Sle1b* congenic males.** (A) Dot plots show the percentage of splenic transitional B cells (identified as

lymphocyte singlets that were CD5<sup>-</sup>CD19<sup>+</sup>CD93<sup>+</sup>) in female B6.*ERα*<sup>+/+</sup>, B6.*ERα*<sup>-/-</sup>, B6.*Sle1b.ERα*<sup>+/+</sup>, and B6.*Sle1b.ERα*<sup>-/-</sup> mice. (B) Representative contour plots from show the frequency of transitional B cells in female B6.*ERα*<sup>+/+</sup>, B6.*ERα*<sup>-/-</sup>, B6.*Sle1b.ERα*<sup>+/+</sup>, and B6.*Sle1b.ERα*<sup>-/-</sup> mice. (C) Dot plots show the percentage of splenocytes in male B6.*ERα*<sup>+/+</sup>, B6.*ERα*<sup>-/-</sup>, B6.*Sle1b.ERα*<sup>+/+</sup>, and B6.*Sle1b.ERα*<sup>-/-</sup> mice that were transitional B cells. (D) Representative contour plots from show the frequency of transitional B cells in male B6.*ERα*<sup>+/+</sup>, B6.*ERα*<sup>-/-</sup>, B6.*Sle1b.ERα*<sup>+/+</sup>, and B6.*Sle1b.ERα*<sup>-/-</sup> mice. (E) Dot plots show the percentage of splenic follicular B cells (identified as lymphocyte singlets that were CD5<sup>-</sup>CD19<sup>+</sup>CD93<sup>-</sup>CD21<sup>-</sup>CD23<sup>+</sup>) in male B6.*ERα*<sup>+/+</sup>, B6.*ERα*<sup>-/-</sup>, B6.*Sle1b.ERα*<sup>+/+</sup>, and B6.*Sle1b.ERα*<sup>-/-</sup> mice. (F) Representative contour plots from show the frequency of follicular B cells in male B6.*ERα*<sup>+/+</sup>, B6.*ERα*<sup>-/-</sup>, B6.*Sle1b.ERα*<sup>+/+</sup>, and B6.*Sle1b.ERα*<sup>-/-</sup> mice. Splenocytes were collected from mice that were 5-6 months of age. The longer horizontal bar in each panel denotes the mean for each group (N=8 per group), and the shorter black bars indicate the standard error of the mean. The \*\* indicates p≤0.01.
