# Supplementary material for: Estrogen Receptor Alpha Signaling Is Responsible for the Female Sex Bias in the Loss of Tolerance and Immune Cell Activation Induced by the Lupus Susceptibility Locus Sle1b
Source: PubMed Central journal article supplement (PMC7683613; doi:10.3389/fimmu.2020.582214), 2020-11-10
Supplement: DataSheet_8.pdf [file DataSheet_8.pdf]

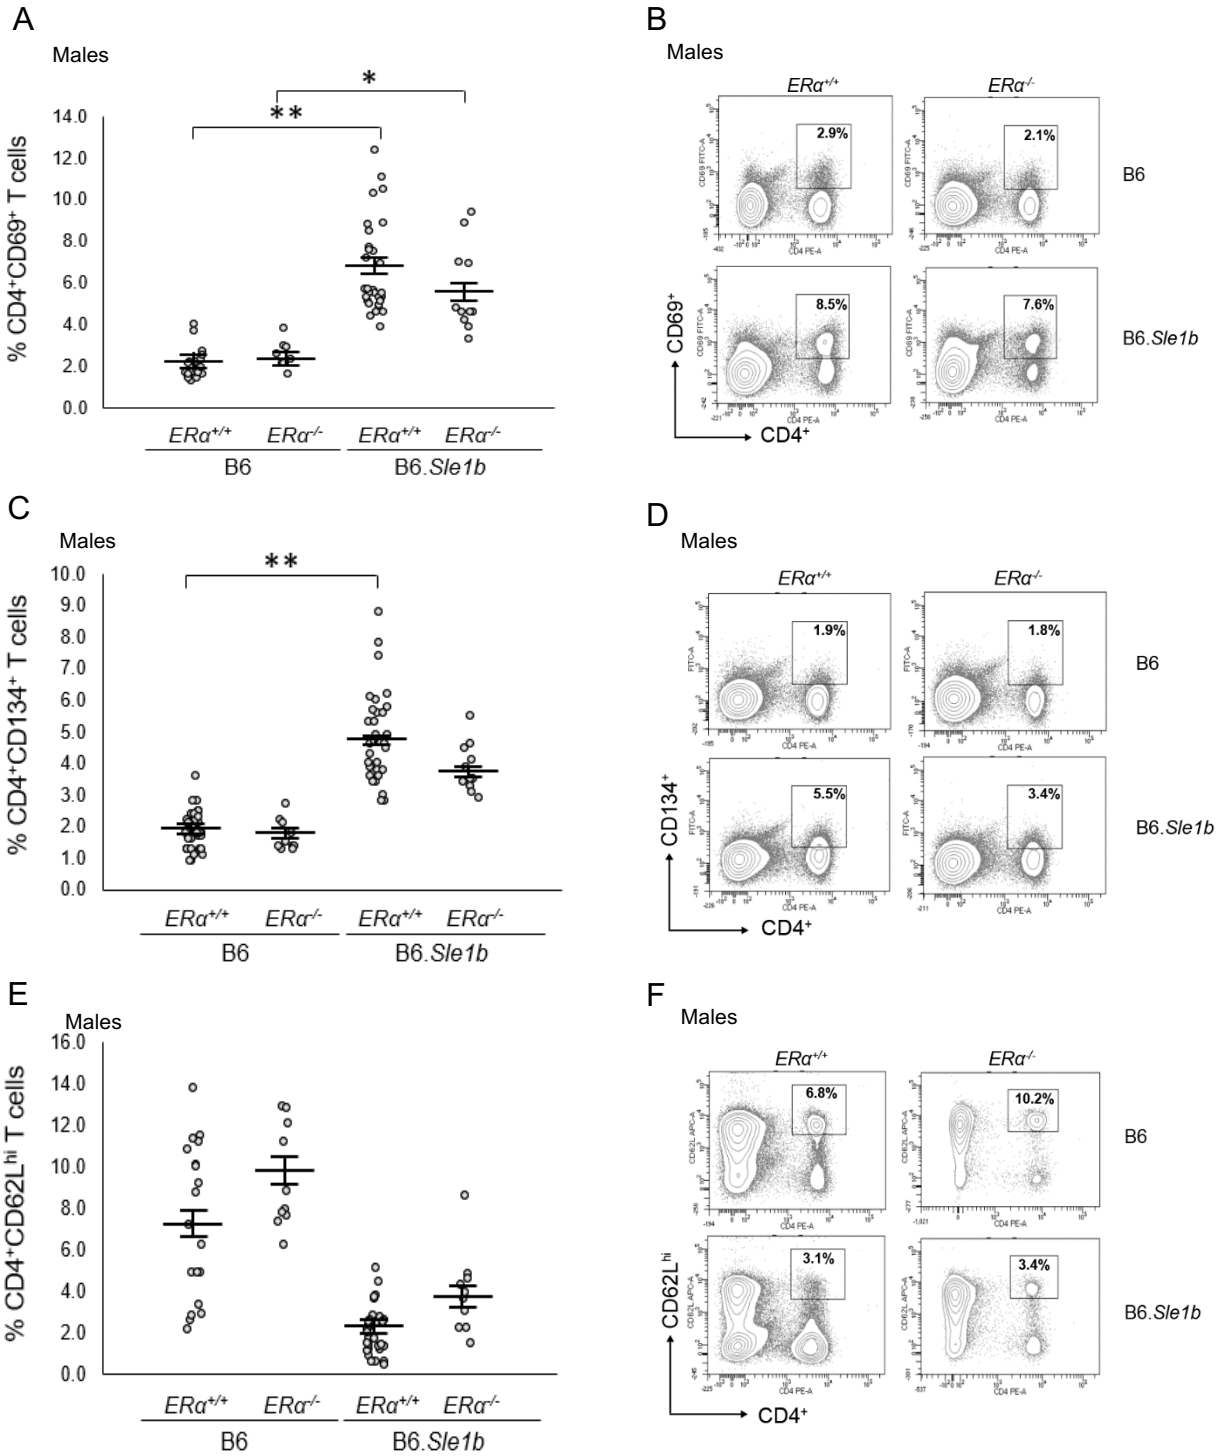

**Supplementary Figure 8: Disruption of ER $\alpha$  does not impacts T cell hyperactivation in B6.*Sle1b* males** (A) Dot plots show the percentage of splenocytes in male B6.*ERα*<sup>+/+</sup>, B6.*ERα*<sup>-/-</sup>, B6.*Sle1b.ERα*<sup>+/+</sup>, and B6.*Sle1b.ERα*<sup>-/-</sup> mice that were CD4<sup>+</sup>CD69<sup>+</sup> activated T cells. (B)

Representative contour plots from show the frequency of CD4<sup>+</sup>CD69<sup>+</sup> T cells in male B6.ERα<sup>+/+</sup>, B6.ERα<sup>-/-</sup>, B6.Sle1b.ERα<sup>+/+</sup>, and B6.Sle1b.ERα<sup>-/-</sup> mice. (C) Dot plots show the percentage of splenocytes in male B6.ERα<sup>+/+</sup>, B6.ERα<sup>-/-</sup>, B6.Sle1b.ERα<sup>+/+</sup>, and B6.Sle1b.ERα<sup>-/-</sup> mice that were CD4<sup>+</sup>CD134<sup>+</sup> activated T cells. (D) Representative contour plots from show the frequency of CD4<sup>+</sup>CD134<sup>+</sup> T cells in male B6.ERα<sup>+/+</sup>, B6.ERα<sup>-/-</sup>, B6.Sle1b.ERα<sup>+/+</sup>, and B6.Sle1b.ERα<sup>-/-</sup> mice. (E) Dot plots show the percentage of splenocytes in male B6.ERα<sup>+/+</sup>, B6.ERα<sup>-/-</sup>, B6.Sle1b.ERα<sup>+/+</sup>, and B6.Sle1b.ERα<sup>-/-</sup> mice that were CD4<sup>+</sup>CD62L<sup>+</sup> naïve T cells. (F) Representative contour plots from show the frequency of CD4<sup>+</sup>CD62L<sup>+</sup> T cells in male B6.ERα<sup>+/+</sup>, B6.ERα<sup>-/-</sup>, B6.Sle1b.ERα<sup>+/+</sup>, and B6.Sle1b.ERα<sup>-/-</sup> mice. Splenocytes were collected from male B6.ERα<sup>+/+</sup> (N=32), B6.ERα<sup>-/-</sup> (N=10), B6.Sle1b.ERα<sup>+/+</sup> (N=32), and B6.Sle1b.ERα<sup>-/-</sup> (N=11) mice that were 5-6 months of age. The longer horizontal bar in each panel denotes the mean for each group, and the shorter black bars indicate the standard error of the mean. The \* indicates p≤0.05, and the \*\* indicates p≤0.01.
